1 **Mosaic evolution of molecular pathways for sex pheromone**  
2 **communication in a butterfly**

3  
4 Caroline M. Nieberding<sup>1\*</sup>, Patrícia Beldade<sup>2,3</sup>, Véronique Baumlé<sup>1</sup>, Gilles San  
5 Martin<sup>1</sup>, Alok Arun<sup>1</sup>, Georges Lognay<sup>1</sup>, Nicolas Montagné<sup>4</sup>, Lucie Bastin-Héline<sup>4</sup>,  
6 Emmanuelle Jacquin-Joly<sup>4</sup>, Céline Noirot<sup>5</sup>, Christophe Klopp<sup>5</sup> & Bertanne Visser<sup>6</sup>

7  
8 <sup>1</sup> Evolutionary Ecology and Genetics group, Biodiversity Research Centre, Earth and Life Institute,  
9 UCLouvain, Belgium

10 <sup>2</sup> Instituto Gulbenkian de Ciência, Oeiras, Portugal

11 <sup>3</sup> CE3C: Centre for Ecology, Evolution, and Environmental Changes, Faculty of Sciences, University of  
12 Lisbon, Portugal

13 <sup>4</sup> Sorbonne Université, INRAE, CNRS, IRD, UPEC, Université de Paris, Institute of Ecology and  
14 Environmental Sciences of Paris, Paris and Versailles, France

15 <sup>5</sup> INRA, Genotoul Bioinfo, Castanet-Tolosan, France

16 <sup>6</sup> Evolution and Ecophysiology group, Biodiversity Research Centre, Earth and Life Institute, UCLouvain,  
17 Belgium

18

19 \*Corresponding author: [caroline.nieberding@uclouvain.be](mailto:caroline.nieberding@uclouvain.be)

20

21 **Author contributions:** CMN conceived and designed the research, collected data, analyzed data,  
22 and prepared the manuscript; PB designed the transcriptomic analysis and discussed the  
23 manuscript; AA, VB, GSM, NM, and LBH collected data; CN, GSM, CK and GL analyzed data;  
24 BV collected data, analyzed data, and prepared the manuscript. All authors edited the manuscript.

25

26 **Acknowledgments:** CMN's team was supported by the Fonds National de la Recherche  
27 Scientifique (FNRS), FRFC grants 2.4600.10 and 2.4560.11 and CR grant 29109376, as well as  
28 UCLouvain ARC grant n° 10/15-031 and FSR grant n°372 605031. BV was supported by FNRS  
29 CR grant 24905063. EJJ, NM and LBH were funded by the French National Research Agency  
30 (ANR-16-CE02-0003-01 and ANR-16-CE21-0002-01 grants).

31

32 **Acknowledgments:** We would like to thank Prof. Ken-Ichi Moto and Prof. Tetsu Ando for  
33 discussions about sex pheromone biosynthesis in Lepidoptera; Dr Jeroen Pijpe for mentoring us  
34 about, and providing access to, a Bioanalyzer Systems (Agilent) at the LUMC hospital in Leiden  
35 (the Netherlands); Marleen van Eijk for assistance with preparing the butterfly tissues. This is  
36 publication BRC321 of the Biodiversity Research Center.

37

38 **Competing interests:** The authors declare no competing interests.

39

40 **Abbreviations:** MSP, male sex pheromone; OR, odorant receptor; OBP, odorant binding protein;  
41 PBAN, pheromone biosynthesis activating neuropeptide.

42

43 **Keywords:** Olfactory communication; Desaturase; Reductase; Odorant receptor; Odorant binding  
44 protein; Chemosensory protein; PBAN; Phylogeny

## 45 **Abstract**

46 Unraveling the origin of molecular pathways underlying the evolution of adaptive traits is essential  
47 for understanding how new lineages emerge, including the relative contribution of conserved,  
48 ancestral traits, and newly evolved, derived traits. Here, we investigated the evolutionary  
49 divergence of sex pheromone communication from moths (mostly nocturnal) to butterflies (mostly  
50 diurnal) that occurred ~98 million years ago. In moths, females typically emit pheromones to attract  
51 male mates, but in butterflies pheromones are used by females for mate choice. The molecular  
52 bases of sex pheromone communication are well understood in moths, but have remained virtually  
53 unexplored in butterflies. We used a combination of transcriptomics, real time qPCR, and  
54 phylogenetics, to identify genes involved in different steps of sex pheromone communication in  
55 the butterfly *Bicyclus anynana*. Our results show that the biosynthesis and reception of sex  
56 pheromones relies both on moth-specific gene families (reductases) and on more ancestral insect  
57 gene families (desaturases, olfactory receptors, odorant binding proteins). Interestingly, *B. anynana*  
58 further appears to use what was believed to be the moth-specific neuropeptide Pheromone  
59 Biosynthesis Activating Neuropeptide (PBAN) for regulation of sex pheromone production.  
60 Altogether, our results suggest that a mosaic pattern best explains how sex pheromone  
61 communication evolved in butterflies, with some molecular components derived from moths, and  
62 others conserved from more ancient insect ancestors. This is the first large-scale analysis of the  
63 genetic pathways underlying sex pheromone communication in a butterfly.

64

65

## 66 **Introduction**

67 Evolution of new life forms occurs through the transition from an ancestral to a descendant clade,  
68 where the newly formed clade generally expresses a mosaic of traits conserved from the ancestor,  
69 as well as newly evolved, derived, traits. Mosaic evolution is indeed a recurring pattern in  
70 paleontology (Cracraft 1970; Gómez-Robles *et al.* 2014; Xu *et al.* 2017). For example, *Tiktaalik*  
71 *roseae*, believed to represent the transition from fishes to amphibians (the “fishapod”; ~375 Mya),  
72 shares some traits with more primitive sarcopterygian fishes (e.g. body scales, fin rays, lower jaw  
73 and palate) and other traits more typical of tetrapods (e.g. shortened skull roof, a modified ear  
74 region, a mobile neck, a functional wrist joint, and other features) (Daeschler *et al.* 2006).  
75 Investigating the genetic bases of ancestral and derived phenotypic traits is essential to obtain a  
76 mechanistic explanation of how mosaic evolution takes place. Examples of studies investigating  
77 the mechanistic basis of mosaic evolution have accumulated in the last decade, including recent  
78 genomic evolution analyses identifying patterns of gene loss, retention, and *de novo* evolution (e.g.  
79 van Gestel *et al.* 2019; Fernández & Gabaldón 2020; Guijarro-Clarke *et al.* 2020). Other patterns  
80 in the genetic bases of trait evolution have suggested a role for hybridization between species (e.g.  
81 Berner & Salzburger 2015; Stryjewski & Sorenson 2017; Marques *et al.* 2019) or co-option of  
82 molecular pathways that acquired new functions (e.g. Shubin *et al.* 2009, including a butterfly,  
83 Shirai *et al.* 2012). Derived phenotypic traits can thus be generated through different molecular  
84 mechanisms that need to be identified case-by-case.

85 Here, we focused on the genetic bases of divergence in sex pheromone communication  
86 during the evolutionary transition from moths to butterflies, which occurred ~98 Mya. Sex  
87 pheromone communication is used by most insects, including butterfly species, for finding,  
88 identifying, and assessing the quality of potential mating partners (Myers 1972; Birch *et al.* 1990;

89 Vane-Wright & Boppre 1993; Nieberding *et al.* 2008; Sarto Monteys *et al.* 2016). Sex pheromone  
90 communication is under strong selection, because it determines mating success and consequently  
91 an individual's contribution to the next generation (Svensson 1996; Moore *et al.* 1997; Smadja &  
92 Butlin 2009; Hansson & Stensmyr 2011; Wyatt 2014). Molecular pathways for sex pheromone  
93 biosynthesis, its regulation, and pheromone reception have been identified in several moth species  
94 (Tillman *et al.* 1999; Jurenka 2004; Blomquist *et al.* 2012; Leal 2013; Yew & Chung 2015; Zhang  
95 *et al.* 2015; Rafaeli 2016). Compared to other insects, moths appear to have evolved moth-specific  
96 genes or gene lineages involved in sex pheromone communication (Jurenka 2004; Pelosi *et al.*  
97 2006; Vieira *et al.* 2007; Leal 2013; de Fouchier *et al.* 2014; Helmkampf *et al.* 2015; Yew & Chung  
98 2015; Bastin-Héline *et al.* 2019). For biosynthesis, most moths use a limited number of enzymes  
99 for desaturation, chain-shortening, reduction, acetylation or oxidation of *de novo* synthesized  
100 saturated fatty acids (Jurenka 2004; Liénard *et al.* 2014; Helmkampf *et al.* 2015; Yew & Chung  
101 2015), which generate tremendous chemical diversity of pheromone components and high species-  
102 specificity of pheromone blends (Tillman *et al.* 1999; Jurenka 2004). Some of these enzyme  
103 families comprise Lepidoptera-specific subclades, such as the  $\Delta 9$ - and  $\Delta 11$ -desaturases (Jurenka  
104 2004; Yew & Chung 2015; Helmkampf *et al.* 2014). Similarly, novel and derived odorant receptor  
105 and odorant binding protein subclades have evolved in moths, which bind specifically to sex  
106 pheromone chemicals (Pelosi *et al.* 2006; Vieira *et al.* 2007; Leal 2013; de Fouchier *et al.* 2014;  
107 Bastin-Héline *et al.* 2019). We aimed to investigate whether butterflies use moth-specific molecular  
108 pathways, more ancestral insect pathways, or have evolved butterfly-specific molecular pathways  
109 for pheromone communication.

110 Butterfly sex pheromones have some ecological specificities that contrast with those of  
111 moths, for which it is used by female moths to signal their location to mating partners in the dark  
112 or at dusk. In contrast, butterfly sex pheromones are generally produced by males and the

113 importance of sex pheromone communication in butterflies was less clear due to their diurnal  
114 lifestyle. Studies on some butterfly species have, however, revealed that sex pheromone  
115 communication is important for determining mating success (e.g. Costanzo and Monteiro 2007;  
116 Nieberding et al. 2008) and fuels speciation events (Bacquet *et al.* 2015). Butterfly sex pheromones  
117 can convey refined information with regard to the identity or quality of potential mating partners  
118 and can be critical for mate choice and species recognition (Andersson 1994; Johansson & Jones  
119 2007). We focused on the butterfly *Bicyclus anynana*, whose sex pheromone composition has been  
120 previously identified and functionally validated (Nieberding *et al.* 2008, 2012). Moreover,  
121 experimental manipulation, including the addition of synthetic sex pheromone perfumes  
122 (Nieberding *et al.* 2008, 2012), and artificial induction of “anosmia” (Costanzo & Monteiro 2007;  
123 van Bergen *et al.* 2013), confirmed the importance of *B. anynana* sex pheromone for mating  
124 success. More than a hundred chemical components have been identified on *B. anynana* adult male  
125 and female bodies (Heuskin *et al.* 2014), but the composition of the male sex pheromone (“MSP”  
126 hereafter) consists of three main volatile components: (Z)-9-tetradecenol (MSP1), hexadecanal  
127 (MSP2) and 6,10,14-trimethylpentadecan-2-ol (MSP3) (Nieberding *et al.* 2008). The identification  
128 and functional validation of these three MSPs and their role in *B. anynana* chemical communication  
129 set this species apart from other lepidopterans, where the role of specific chemical components  
130 often remains elusive in relation to fitness (but see Nieberding PLoS ONE 2008 where specific  
131 components were identified). MSP1 and MSP2 are derived from fatty acids and are typically found  
132 in the pheromone blends of many moth species (Jurenka 2004), which led us to hypothesize that  
133 *B. anynana* uses the same genes as moths for sex pheromone communication.

134 To investigate if butterflies use what were believed to be moth-specific gene families,  
135 despite 98 million years since the divergence of butterflies from moths (Wahlberg *et al.* 2013), we  
136 used RNA-seq to identify genes that could be involved in *B. anynana* pheromone production,

137 biosynthesis regulation, and reception. We compared transcript abundance of sex pheromone-  
138 related adult tissues (male pheromone producing structures, heads and antennae) with control  
139 tissues (female wings and heads), and validated our findings with qPCR. We identified specific  
140 candidate genes involved in the different olfactory communication functions and used phylogenetic  
141 analyses to identify the molecular origin of those genes. Our results reveal that sex pheromone  
142 communication in *B. anynana* evolved through a mosaic of ancestral insect genes, and more  
143 derived lepidoptera-specific genes.

144

## 145 **Results and Discussion**

### 146 *Candidate gene identification by transcriptome sequencing*

147 Numerous publications document gene expression studies focusing on chemical communication in  
148 Lepidoptera, but only two studied butterflies (Briscoe *et al.* 2013; van Schooten *et al.* 2016), and  
149 none of those investigated butterfly sex pheromone communication. Here, we produced six RNA  
150 libraries from different adult tissues that were specifically chosen to cover the various steps of male  
151 pheromone communication (Figure 1): pheromone biosynthesis (which occurs in dedicated  
152 structures on male wings, called androconia; Nieberding *et al.* 2008), its neuro-regulation (in the  
153 brain), and pheromone reception (in antennae). Approximately 500 male and female *B. anynana*  
154 adults were dissected and relevant tissues assigned to different libraries (Figure 1A). For  
155 pheromone synthesis, we compared transcripts in male androconia (Library “androconia”) with  
156 those in remaining adult male wing parts (Library “male wings”) and adult female wings (Library  
157 “female wings”) as controls. For regulation of pheromone communication, we compared transcript  
158 abundance between adult male heads (where the regulation of pheromone synthesis takes place;  
159 Library “adult male heads”) and adult female heads (Library “adult female heads”, control). For

160 pheromone reception, we compared transcripts between adult male and female antennae (the tissue  
161 where pheromone reception takes place; Nieberding et al (2008); Library “antennae”) and adult  
162 heads (Libraries “male heads” and “female heads”) as controls. Two other libraries were also  
163 analyzed, corresponding to pupal wings in males (Library “pupal male wings”), and females  
164 (Library “pupal female wings”), but these data will not be discussed to focus solely on adults, the  
165 stage during which pheromone communication takes place. The total of 737,206 Roche 454 reads  
166 obtained from the different tissues sampled in *B. anynana* were assembled into 43,149 contigs,  
167 with 76,818 remaining non-assembled singletons (Figure 1B and C, Supplementary Table 1). The  
168 transcriptome contained 48.6% near-complete sequence information compared to the insect  
169 database (S: 43%; D: 5.6%; F:23%; M: 28.4%; BUSCO v4.0.6; Simão *et al.* 2015). The transcripts  
170 were annotated based on reference genomes for several butterfly species (including *B. anynana*;  
171 Nowell *et al.* 2017), as well as other relevant insect species (see materials and methods section  
172 ‘Transcriptome assembly, quantification, and annotation’).

173         Using the digital differential display (DDD) tool (of NCBI’s UniGene database;  $p < 0.05$ ),  
174 a total of 422 contigs were found to be differentially expressed when tissue-specific libraries were  
175 compared (Supplementary Table 1). Expression differences were validated by real time  
176 quantitative PCR analyses on 10 selected candidate chemical communication genes, showing that  
177 relative differences in expression levels in our transcriptome dataset matched those quantified by  
178 RT-qPCR (Supplementary Figure 1).

179



A

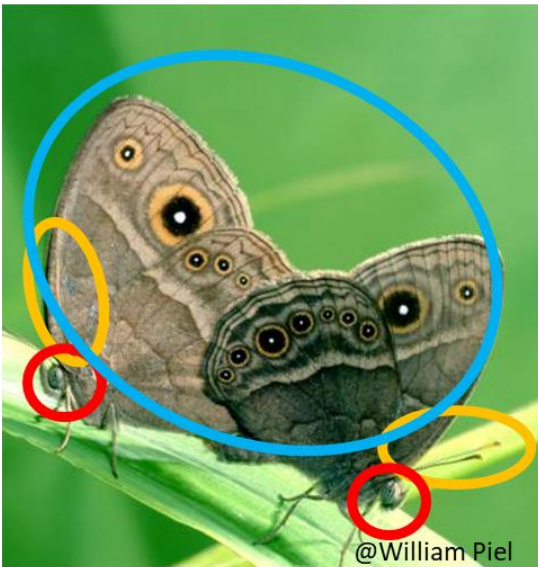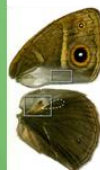

**Libraries for PRODUCTION**

- androconia [30.691 reads]
- male wings [30.733 reads]
- female wings [29.814 reads]

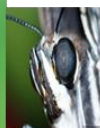

**Libraries for REGULATION**

- male heads [6.661 reads]
- female heads [111.904 reads]

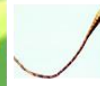

**Library for RECEPTION**

- antennae [236.650 reads]

B

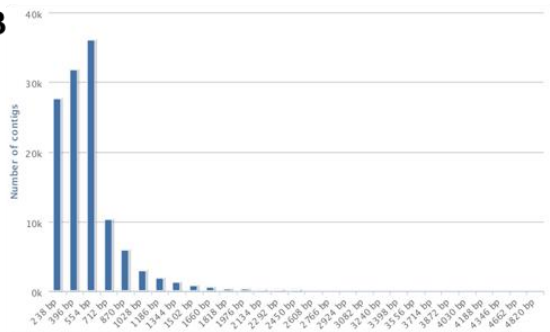

C

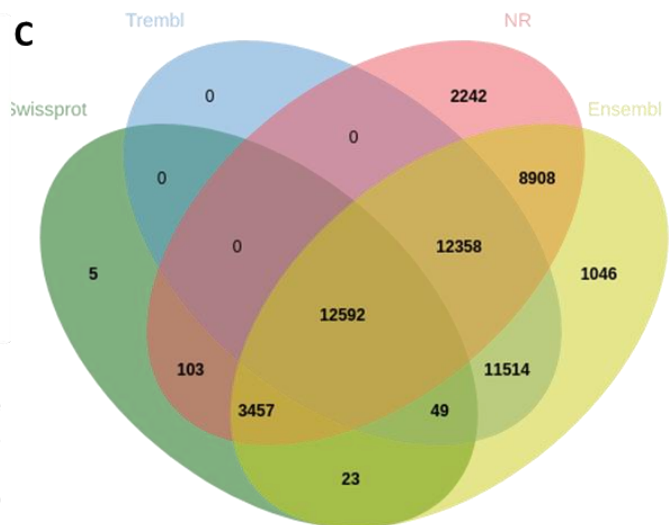

**Figure 1:** A) Experimental design for the transcriptomics experiment showing the 3 steps involved in male sex pheromone communication and the corresponding tissues sampled to produce the RNA libraries (also including developmental libraries, not shown here). The number of sequenced and cleaned reads per library is provided. B) Information about the number of contigs in the transcriptome. C) Venn diagram of annotated contig with regard to databases: Swissprot, Trembl, NR and 10 species of Ensembl Lepbase.

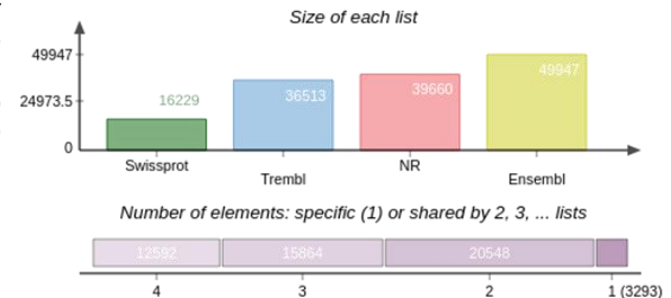

180

181

182 ***B. anynana* sex pheromone biosynthesis**

183 *B. anynana* was the first butterfly for which sex pheromone biosynthesis molecular pathways were  
184 investigated and compared to those of moths (Liénard *et al.* 2014). One gene related to pheromone  
185 communication was overexpressed in *B. anynana* male androconial wing tissues compared to male  
186 and female control wing samples (i.e., ‘type 1’ contigs in Supplementary Table 1), an aldose  
187 reductase-like gene. This gene was also overexpressed in the male androconial wing tissue alone.  
188 Moreover, a  $\Delta 9$ -desaturase gene was also found to be overexpressed in this library. In contrast to  
189 earlier findings in *B. anynana* (Liénard *et al.* 2014), no fatty-acyl reductase (FAR), nor  $\Delta 11$ -  
190 desaturase were found overexpressed in male androconial wing tissue (Supplementary Table 1).

191 Desaturases (that add a double bond to fatty acid substrates) were previously found to be  
192 involved in *B. anynana* MSP biosynthesis (Liénard *et al.* 2014). We, therefore, extended our search  
193 for desaturase genes for each of the libraries separately. We focused specifically on  $\Delta 9$  and  $\Delta 11$ -  
194 desaturases, because these enzymes play an important role in moth pheromone biosynthesis  
195 (Liénard *et al.* 2014; Yew & Chung 2015). Previous work with *B. anynana* suggested that a  $\Delta 11$ -  
196 desaturase is involved in the production of MSP1 (Liénard *et al.* 2014). Both  $\Delta 9$ - and  $\Delta 11$ -  
197 desaturase were present in the transcriptome, mainly in antennae. A phylogenetic tree containing  
198 our  $\Delta 9$ - and  $\Delta 11$ -desaturase contigs further revealed a similar position within the larger desaturase  
199 phylogenetic tree, compared to earlier work (Liénard *et al.* 2014; Supplementary Figure 2).

200 To get more insight into the role played by the  $\Delta 9$  and  $\Delta 11$  desaturase gene, we used RT-  
201 qPCR (cf. protocol in Arun *et al.* 2015) to compare transcript abundance between different adult  
202 wing tissues, the main tissue producing MSP1 (and using RNA extracted from new samples).  $\Delta 9$ -  
203 desaturase transcript abundance was approximately four-fold higher than that of  $\Delta 11$ -desaturase  
204 (Welch Two Sample t-test on normalized Ct values;  $t = -8.56$ ,  $df = 9.11$ ,  $p$ -value  $< 0.0001$ ;  
205 Supplementary Figure 1). When comparing the spatial distribution of MSP1 on *B. anynana* body

206 parts with our RT-qPCR data for the two  $\Delta$ -desaturase genes (Supplementary Figure 3A), the  
207 expression profile of the  $\Delta 9$ -desaturase gene, but not the  $\Delta 11$ -desaturase gene, matched MSP1  
208 distribution (Supplementary Figure 3B and 3C, respectively). Indeed, the  $\Delta 9$ -desaturase gene  
209 showed overall significant variation in transcript abundance across tissues that correlated with the  
210 distribution pattern of MSP1 (nested ANOVA,  $n = 24$  samples with 3 biological replicates and 2  
211 technical replicates;  $F_{3,6} = 883.5$ ;  $p\text{-value} < 0.01$ ). Specifically,  $\Delta 9$ -desaturase was found to be  
212 significantly overexpressed in male wing parts containing the androconia that produce MSP1,  
213 compared to remaining male wing tissues (nested ANOVA;  $F_{1,4} = 1,814.0$ ;  $p\text{-value} < 0.01$ ) and  
214 female wings (nested ANOVA;  $F_{1,4} = 50.5$ ;  $p\text{-value} < 0.01$ ). Moreover,  $\Delta 9$ -desaturase gene  
215 expression was also found to be significantly overexpressed in male head tissue containing MSP1.  
216 No such match between gene expression and MSP1 abundance was found for the  $\Delta 11$ -desaturase  
217 gene, which showed no significant variation in transcript abundance across tissues known to  
218 contain MSP1 (nested ANOVA,  $F_{3,6} = 0.07$ ;  $p\text{-value} < 0.01$ ). Altogether, these findings suggest  
219 that a  $\Delta 9$  desaturase plays a role in *B. anynana* pheromone biosynthesis.

220 We then searched for genes from a second gene family known to be involved in sex  
221 pheromone production in *B. anynana*: fatty acyl reductases (*far*), which convert fatty-acyl  
222 pheromone precursors to alcohol (Liénard *et al.* 2014). While more than 20 FARs have been  
223 experimentally characterized from 23 moth and butterfly species, all FARs implicated in moth and  
224 butterfly sex pheromone biosynthesis are restricted to a single clade, suggesting that one FAR  
225 group was exclusively recruited for pheromone biosynthesis (Tupec *et al.* 2017; 2019 and refs  
226 therein). In our transcriptome, two reductase contigs were annotated and identified in male and  
227 female antennae: enoyl-CoA reductase and fatty-acyl reductase 1, *far 1*. As *far 1* and another fatty-  
228 acyl reductase, *far 2*, were previously found to be involved in MSP2 and MSP1 biosynthesis,  
229 respectively (Liénard *et al.* 2014), we manually mined our transcriptome for *far 1* and *far 2* contigs

230 by n-blasting *far1* and *far2* specific gene sequences. Contigs matching *far1* were largely  
231 overexpressed in androconia (171 copies), compared to wing controls (0 copies; Supplementary  
232 Table 2). While contigs matching *far2* showed an overall low expression level in wing tissues  
233 (Supplementary Table 3), a previous qRT-PCR study revealed that *far2* gene expression matched  
234 MSP1 biosynthesis (Arun *et al.* 2015), highlighting the potential importance of *far2* for *B. anynana*  
235 pheromone production.

236         The low expression level of *far2* is surprising given the amount of MSP1 present on male  
237 wings (2 µg/individual on average); hence we suggest that alternative candidates for MSP1  
238 biosynthesis could be aldo-keto reductases, two of which are among the most expressed genes in  
239 androconial male wing tissues (Supplementary Table 1). Indeed, fatty-acyl reductases are usually  
240 associated with the reduction of aldehyde into alcohols producing various sex pheromone  
241 components in moths (Moto *et al.* 2003; Ando *et al.* 2004), but aldo-keto reductases are regularly  
242 found highly expressed in sex pheromone transcriptomes of moth species (Gu *et al.* 2013; Zhang  
243 *et al.* 2014). Guo *et al.* (2014) and Yamamoto *et al.* (2016) have proposed that aldo-keto reductases  
244 are involved in sex pheromone biosynthesis in the moths *Helicoverpa armigera* and *Bombyx mori*  
245 by reducing 9-hexadecenal, 11-hexadecenal and 10E,12Z-hexadecadienal into alcohol. Our  
246 expression data suggest that an aldo-keto reductase, with or without *far2*, may be involved in MSP1  
247 biosynthesis.

248

## 249 **B. anynana sex pheromone reception**

250 The genomes of the butterflies *Danaus plexippus* and *Heliconius melpomene* (i.e., species for  
251 which phylogenies of odorant receptor genes were available) have revealed a large number of genes  
252 belonging to families known to be involved in olfactory reception in moths, including odorant  
253 receptors, and odorant binding proteins (Zhan *et al.* 2011; Dasmahapatra *et al.* 2012; Briscoe *et al.*

254 2013). Specifically, the odorant receptor (OR) and odorant binding protein (OBP) gene families  
255 contain lineages specialized in the detection of sex pheromones in moths, the so-called pheromone  
256 receptors (PRs) and pheromone-binding proteins (PBPs) (Sakurai *et al.* 2004; Zhang & Löfstedt  
257 2015; Bastin-Héline *et al.* 2019; Vogt *et al.* 2015). ORs are transmembrane receptors that bind  
258 volatile chemicals and are responsible for signal transduction in insect olfactory sensory neurons.  
259 They exhibit various response tuning breadths, and moth ORs involved in pheromone detection are  
260 often (but not always) highly specific to one or a few pheromone components (Zhang & Löfstedt  
261 2015). We, therefore, expected to identify ORs binding to each of the three known chemical  
262 components of the *B. anynana* male sex pheromone: MSP1, 2, and 3 (Nieberding *et al.* 2008). We  
263 identified the obligatory co-receptor “Orco” and 16 ORs in the transcriptome, some of which were  
264 overexpressed in antennae compared to other adult tissues (Supplementary Table 4). Phylogenetic  
265 analysis revealed that ORs expressed in *B. anynana* were distributed among various lepidopteran  
266 OR lineages (Figure 2; Dasmahapatra *et al.* 2012), but none were located in the classically defined  
267 sex pheromone receptor clade (Bastin-Héline *et al.* 2019; Shen *et al.* 2020; Figure 2). Our results  
268 suggest that *B. anynana* sex pheromone reception may have evolved from lepidopteran OR lineages  
269 other than the sex pheromone lineage.



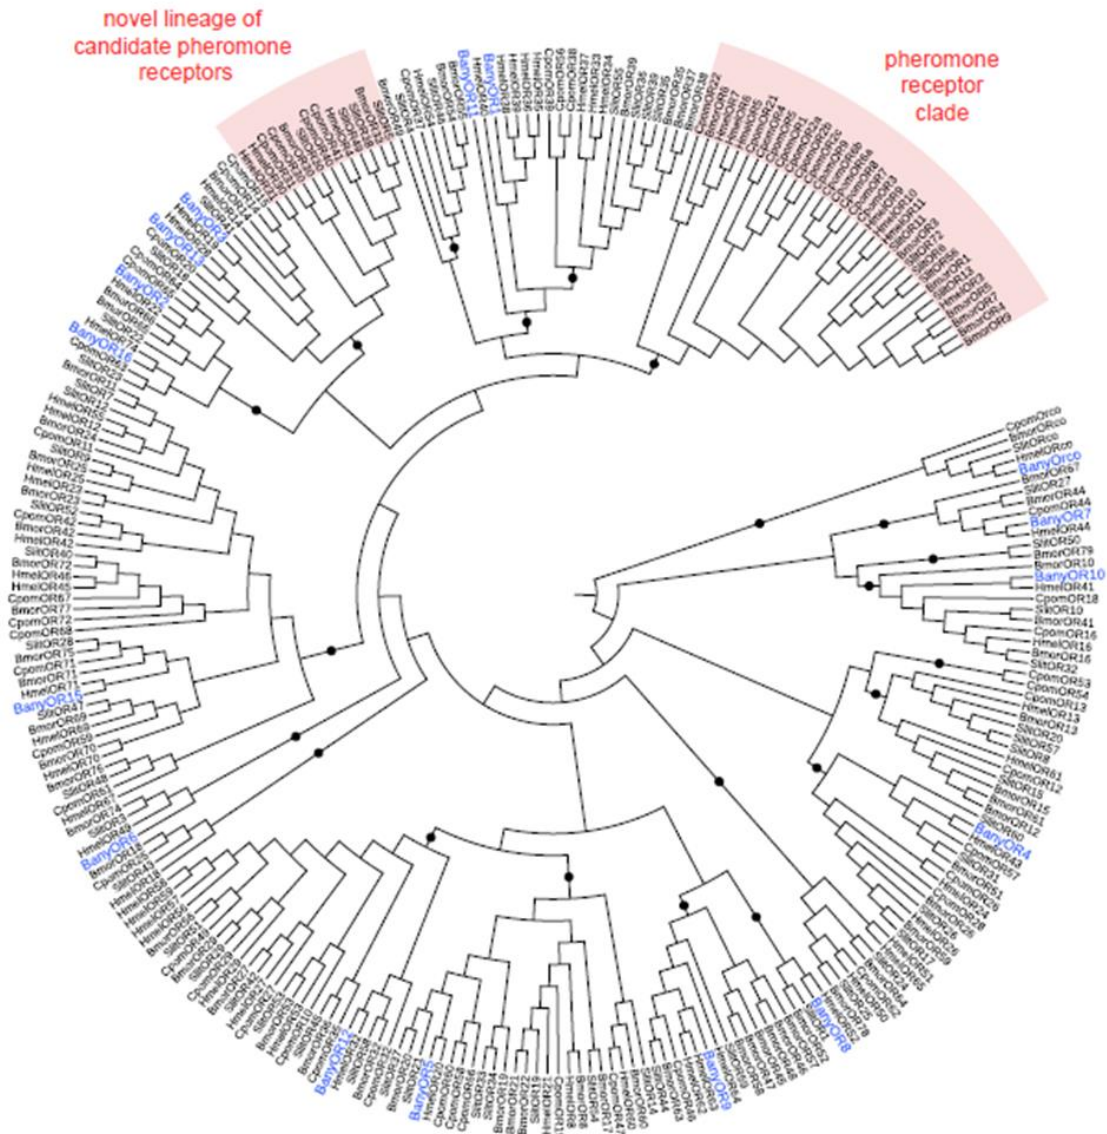

**Figure 2:** Maximum-likelihood phylogeny of Lepidopteran odorant receptors (OR), including the 16 ORs found in the *B. anynana* transcriptome (BanyOR, in blue). Bmor, *Bombyx mori*; Cpom, *Cydia pomonella*; Hmel, *Heliconius melpomene*; Slit, *Spodoptera littoralis*. Black circles indicate branchings highly supported by the approximate likelihood-ratio test (aLRT > 0.95).

270

271

272

273

274

275

Recent studies have revealed that moth PRs do not constitute a monophyletic clade and, instead, evolved several times during OR evolution (Yuvaraj et al 2017, Bastin-Héline et al 2019). Functional PRs that have been found outside of the PR clade in some moth species were identified based on their sex-biased expression. We, therefore, searched for potential *B. anynana* PRs by quantifying the expression levels between sexes using qPCR, expecting that PR in *B. anynana*

276 should be more expressed in male than female antennae. We further expected that gene expression  
277 levels would correlate with temporally varying physiological and biological needs. In moth species,  
278 PRs are critical for detecting the female sex pheromone and the male's behavioral and  
279 physiological responses to female sex pheromones were shown to be affected by moth age and  
280 mating status (Soques *et al.* 2010, Saveer *et al.* 2012). We, therefore, tried to identify *B. anynana*  
281 candidate PRs by comparing RNA expression levels in females with different mating status (using  
282 qPCR). We expected that virgin females that had developed either in isolation (naive “virgin”) or  
283 in the presence of male scent (“virgin sensitized”) would exhibit higher expression levels for OR  
284 genes responsible for detecting the male sex pheromone, compared to mated females  
285 (“mated”)(Zeng *et al.* 2013 *Biochem Biophys Res Commun*; Immonen *et al.* 2012 *PRSB*). This  
286 difference would be due to virgin females taking information about the composition of the male  
287 sex pheromone for choosing mates regarding their inbreeding level (van Bergen *et al.* 2013) or  
288 their age (Nieberding *et al.* 2012), and because recently mated females are much less receptive to  
289 courtship attempts in *B. anynana*. The candidate genes Ban\_OR1, Ban\_OR2 and Ban\_Orco were  
290 selected for qPCR experiments because these genes displayed the highest expression among the 16  
291 identified candidate ORs and were significantly overexpressed in antennae compared to control  
292 libraries (Supplementary Table 4). Orco expression was significantly decreased in mated compared  
293 to virgin (naïve or sensitized) females, but Bany\_OR1 or Bany\_OR2 were not (Figure 3). This  
294 finding suggests that the regulation of the expression of Orco could be a mediator of sex pheromone  
295 receptivity. Orco, and not specific parts of the odorant receptor dimer, such as OR1, OR2 or other  
296 odorant receptors that we did not test here, could be regulated by sex pheromone communication,  
297 similar to what was previously found in cockroaches (Soques *et al.* 2010; Latorre-Estivalis *et al.*  
298 2015).

299 In addition to the work described above, we tried to functionally investigate if some specific  
300 OR candidate genes were responsible for the detection of male pheromone components using  
301 heterologous expression in *D. melanogaster* olfactory sensory neurons coupled to  
302 electrophysiological recordings. These experiments did not lead to functional validation, but the  
303 procedures followed and results obtained are described in Supplementary File 1.  
304

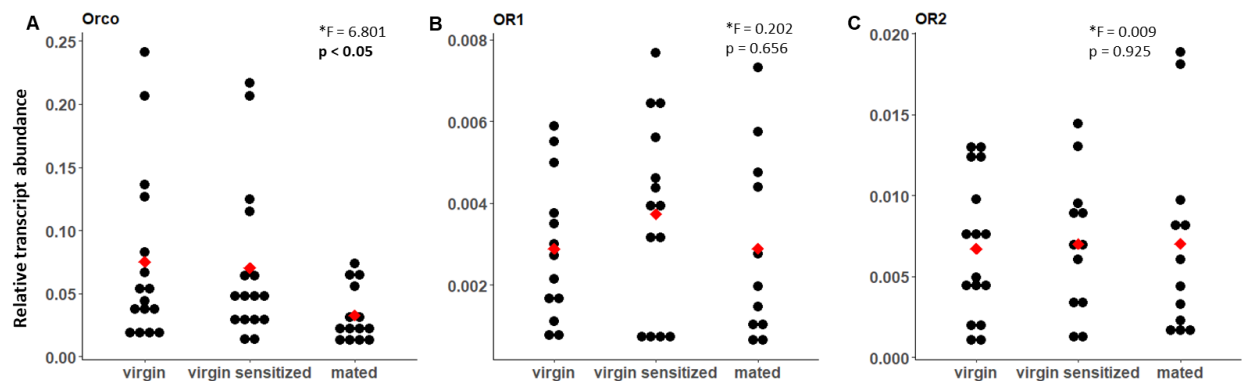

305 **Figure 3:** qPCR expression level of odorant receptors (OR) in antennae of female *B. anynana* with different mating status. Orco (A), but not OR1 (B) or OR2 (C), RNA  
306 expression level differed significantly in virgin naïve (left) and virgin sensitized (middle) compared to mated (right) females. Each treatment is the mean of 3 to 7  
biological replicates. A nested ANOVA was used to test for differences between groups. F and p values are included for each graph. \*log transformed data.

307 A second gene family specific to insects, the OBP family, is involved in olfaction by  
308 solubilizing semiochemicals once they have entered the aqueous lymph within olfactory sensilla  
309 (Leal et al 2013). OBPs have been proposed to play an important role in response sensitivity. In  
310 Lepidoptera, a dedicated lineage of OBPs (the so-called “pheromone-binding proteins” or PBPs)  
311 has evolved high affinity towards pheromone components (Vogt *et al.* 2015). We identified 46  
312 contigs assembled into 13 OBP unigenes expressed in our *B. anynana* transcriptome  
313 (Supplementary Table 5), a number lower than what has been described in various transcriptomes  
314 from moth species (49 predicted OBPs in *Spodoptera littoralis* and *Manduca sexta*; Walker et al  
315 2019) and in the genomes of two butterfly species (32 in *Danaus plexippus*, 51 in *Heliconius*  
316 *Melpomene*; Pelosi *et al.* 2014, 2018; Venthur & Zhou 2018). *B. anynana* expressed OBPs were



317 found in most subclades of the phylogenetic tree of lepidopteran OBPs, including general odorant  
318 binding protein 1 and 2 lineages, as well as classic, minus-C, plus-C and duplex OBP lineages  
319 (with categories based on the level of sequence homology and conserved amino acid signatures;  
320 Supplementary Figure 4). In Lepidoptera, the OBP gene family also includes a lineage of the PBPs,  
321 thought to transport pheromone molecules (Vogt *et al.* 2015). In moths, such as *Manduca sexta*  
322 and *Bombyx mori*, trichoid sensilla are associated with pheromone perception and express  
323 specifically PBP-A. No *B. anynana* expressed OBP clustered in the pheromone-binding protein-A  
324 or -B lineages (Supplementary Figure 4). This is similar to what has been found in other butterfly  
325 species: the PBP-A lineage is lacking in the genome of *Danaus plexippus* and the PBP-A and PBP-  
326 B lineages are absent from the genomes of *Heliconius melpomene* and *Melitaea cinxia* (Vogt *et al.*  
327 2015). In contrast, we did find two candidate PBPs (Supplementary Table 5), expressed in *B.*  
328 *anynana* antennae, which belong to the pheromone-binding protein-C and -D lineages present in  
329 all butterfly genomes investigated to date (Vogt *et al.* 2015). These candidate PBPs indeed  
330 correspond to the two sole candidate PBP genes identified in the *B. anynana* genome, and are both  
331 most similar to two PBPs found in the antennae of *H. melpomene* (Dasmahapatra *et al.* 2012;  
332 Supplementary Figure 4). In most moths, PBP-C and PBP-D OBPs are expressed in basiconic  
333 sensilla and are associated with foraging (Vogt *et al.* 2015). Although we cannot exclude that we  
334 missed BanOBPs in our transcriptome, the lack of a PBP-A subgene family in *B. anynana*, as in  
335 the four other butterflies studied to date (*H. melpomene*, *D. plexippus*, *M. cinxia*, *P. polytes*),  
336 suggests that butterflies lost this gene lineage (at least in the Nymphalidae, the family of butterflies  
337 to which the sampled species belong), and possibly use other PBP lineages to functionally aid the  
338 OR-pheromone connection. The transcriptome was further mined for Chemosensory Proteins  
339 (CSPs), a third gene family potentially implicated in olfaction in insects (Sánchez-Gracia *et al.*  
340 2009; Vieira & Rozas 2011), for which the results are available in Supplementary Table 6.

341

342 **B. anynana sex pheromone regulation**

343 Eleven contigs were found overexpressed in male compared to female brains, but their role in the  
344 regulation of sex pheromone processing remains open (Supplementary Table 1). Given its role as  
345 a key regulator of female sex pheromone biosynthesis in many moth species (Bloch *et al.* 2013),  
346 we focused our attention on Pheromone Biosynthesis Activating Neuropeptide (PBAN). We  
347 hypothesized that PBAN could be involved in male sex pheromone regulation in *B. anynana*, and  
348 looked for it in our transcriptome database. We identified one unigene annotated as PBAN  
349 (BA\_PBAN.1.1), which was expressed in adult heads. We used this sequence to obtain the  
350 complete cDNA sequence of PBAN in *B. anynana* (RACE), Ban\_PBAN (Figure 4A). The  
351 phylogenetic reconstruction of PBAN across Lepidoptera shows monophyly of butterfly PBANs  
352 (data not shown). We next investigated the PBAN cDNA tissue distribution using semi-quantitative  
353 and quantitative PCR. PBAN was found to be expressed in adult heads, but not in other tissues,  
354 and more strongly in males than in females (Figure 4B). PBAN in male moths is suspected to be  
355 involved in male pheromone biosynthesis: the PBAN receptor of the moth *Helicoverpa armigera*  
356 was found expressed in male hairpencils, and PBAN stimulation of the hairpencils was found to be  
357 responsible for the production and release of male pheromonal components (Bober & Rafaeli  
358 2010). Next, we used RT-qPCR and found that PBAN expression level in male brains correlated  
359 with the amount of male sex pheromone found on male wings during the adult male's lifetime,  
360 with maximum content around 15 days (Figure 4C; Nieberding *et al.* 2012).

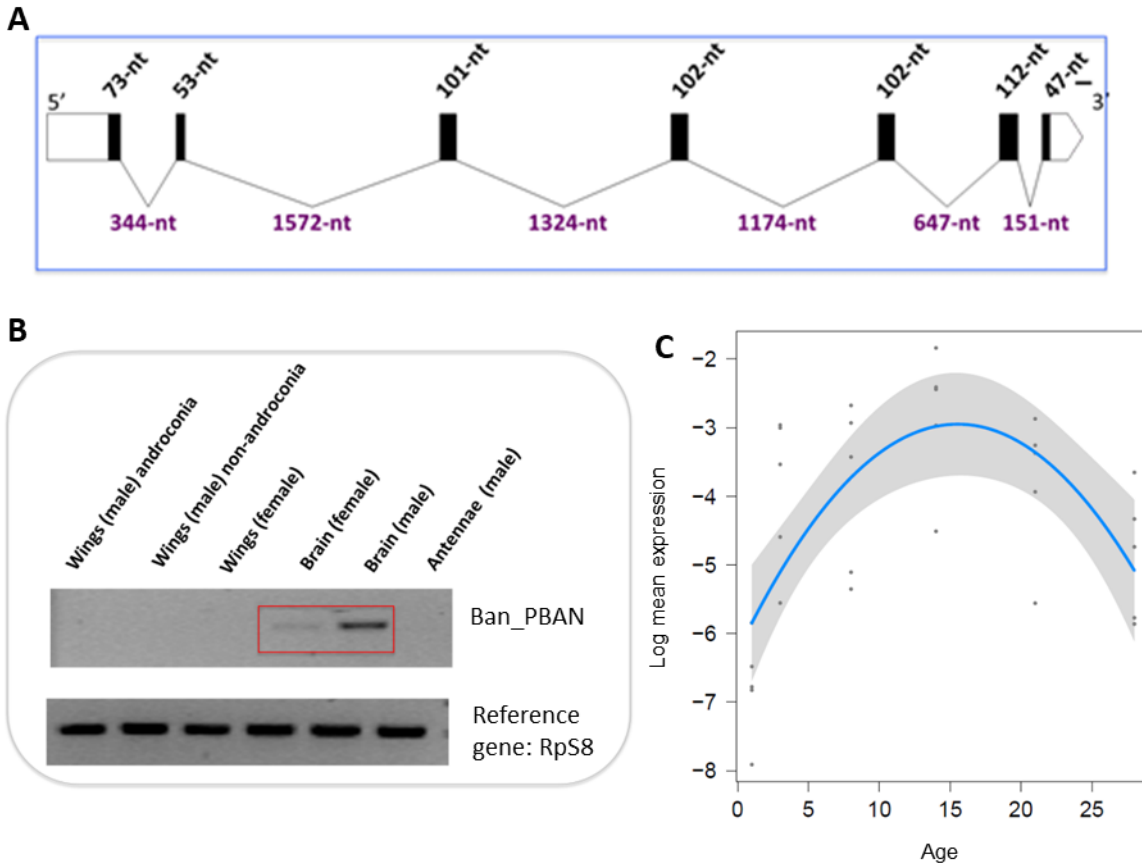

**Figure 4:** Pheromone binding activating neuropeptide (PBAN) expression in *B. anynana*. A) Structure of Ban\_PBAN full length gene sequence (594 bp). The 7 exons (encoding 198 amino acids) are represented by black boxes and the 6 introns by lines. B) PBAN expression level quantified by semi-quantitative PCR in adult tissues (brains, wings, antennae) of males and females ranging from 3 to 14 days of age. Higher levels of PBAN are observed in male brains compared to the other adult tissues. C) PBAN expression level quantified by real time qPCR in adult male brains from 1 to 28 days of age.

361

362 In moths, production of volatile sex pheromones usually shows a circadian pattern that is

363 regulated by PBAN and correlates with the female “calling” behavior (extrusion of the sex

364 pheromone gland) during specific hours of the scotophase (Rosén 2002; Bloch, Hazan, and Rafaeli

365 2013). A circadian rhythm of male sex pheromone production was also found in the moth *Aphomia*

366 *sabella* (Levi-Zada *et al.* 2014). We tested whether *B. anynana* displayed daily variation in

367 courtship activity, MSP production, and PBAN expression in 8-day old adult males. We found that

368 courtship activity peaked 7 to 12 hours after sunrise, and courtship activity was significantly higher

369 in the afternoon compared to the rest of the day (Figure 5A; likelihood ratio test on the “Time”

370 effect,  $p = 0.005$ ; Supplementary Table 7 and 8). Similarly, MSP production significantly varied  
371 during the course of the day, and peaked around maximum courtship activity, with MSP1/MSP2  
372 and MSP2/MSP3 ratios displaying significant reversed changes during the day (Figure 5D;  
373 likelihood ratio test on the “Time<sup>2</sup>”  $p = 0.004$  and  $p = 0.002$ , respectively; Supplementary Table 8).  
374 MSP amounts also displayed a slight, but non-significant, variation with time of the day (Figure  
375 5C; likelihood ratio test on the “Time<sup>2</sup>” effect,  $0.007 < p < 0.09$ ; Supplementary Table 8). MSP  
376 titers were estimated to be minimum around 11 hours after sunrise for MSP1 and MSP3, while the  
377 MSP2 titer was estimated to be at a maximum 12.4 hours after sunrise. We further found that PBAN  
378 expression significantly varied throughout the day as well (Figure 5B), with the highest expression  
379 11 to 14 hours after sunrise. Daily variation in PBAN expression thus correlates both to male  
380 courtship activity and to male sex pheromone quantities found on male wings: all three traits peak  
381 during the afternoon and PBAN expression is maximal just before the peak in MSP2/MSP1 and  
382 MSP2/MSP3 ratios and MSP2 amount. This suggests that the daily regulation of male sex  
383 pheromone may be associated to circadian variation in PBAN expression, a neuropeptide that is  
384 specific to sex pheromone regulation in moths (Cheng *et al.* 2010).  
385

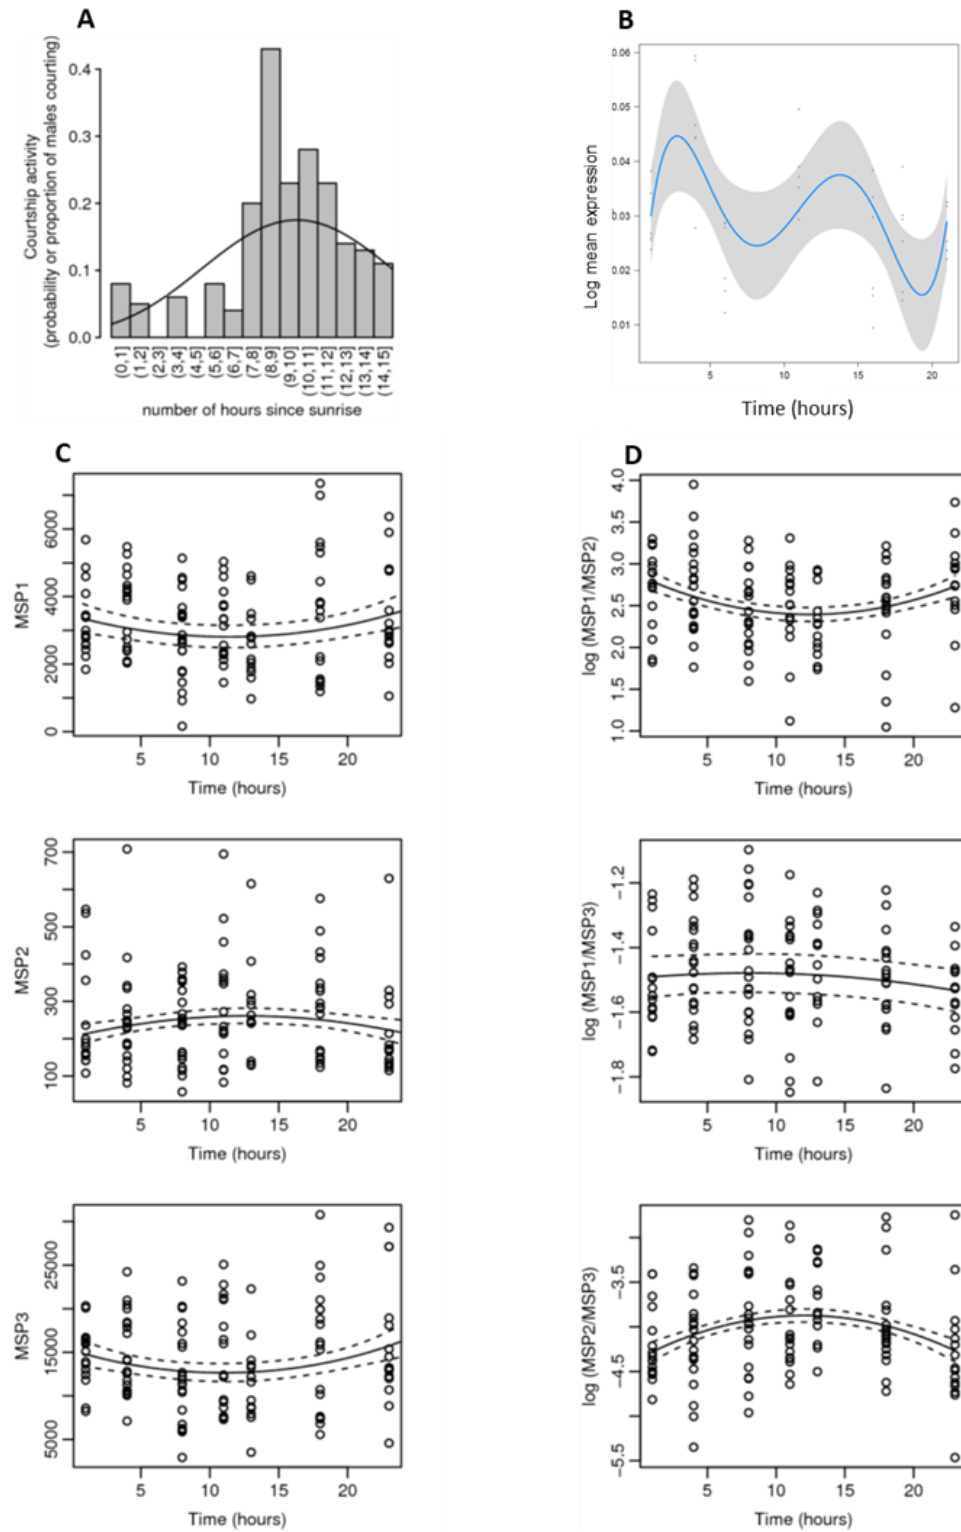

**Figure 5:** Daily variation in *B. anynana* male courtship activity (A), PBAN expression by qPCR (B), MSP production (C) and log MSP ratio production (D).

387 In addition to the work described above, we aimed to functionally demonstrate the role of  
388 PBAN expression in regulating male sex pheromone biosynthesis in *B. anynana*. These  
389 experiments did not lead to functional validation of the role of PBAN, but all procedures followed  
390 and results obtained are described in Supplementary File 2.

391

## 392 **Conclusions and perspectives**

393 This is the first time a transcriptomics approach has been used to gain insight into the different  
394 aspects of sex pheromone communication in a butterfly. Our model, *B. anynana*, is the only  
395 butterfly species for which the sex pheromone composition and its role in male mating success in  
396 relation to different fitness-associated traits (e.g., age and inbreeding level) have been demonstrated  
397 (Costanzo & Monteiro 2007; Nieberding *et al.* 2008, 2012; van Bergen *et al.* 2013). The male sex  
398 pheromone composition and function in communication between sexes has been partially analyzed  
399 in only a few additional butterfly species, including *Pieris napi*, *Colias eurytheme*, *Danaus*  
400 *gilippus*, *Idea leuconoe*, and more recently *Heliconius melpomene* (Pliski & Eisner 1969; Taylor  
401 1973; Grula *et al.* 1980; Sappington & Taylor 1990a, b; Nishida *et al.* 1996; Andersson *et al.* 2007;  
402 Darragh *et al.* 2017).

403 Mosaic evolution appears to have taken place at the molecular level based on our  
404 investigation of the pathways involved in the production, reception, and regulation of the sex  
405 pheromone in *B. anynana*: our data suggest that the biosynthesis of the three chemical components  
406 forming the male sex pheromone could be partly due to moth-specific genes (*far1* and *far2* for the  
407 MSP2 and MSP1 components, respectively) and partly due to genes present in insects other than  
408 moths ( $\Delta 9$ -desaturase, aldo-keto reductase for the MSP1 component). This is also likely the case  
409 for the MSP3 component whose synthesis is not expected to rely on moth-specific gene families,

410 as this pheromone component is not derived from fatty acids. None of the expressed odorant  
411 receptors or odorant binding proteins in *B. anynana* belonged to Lepidoptera-specific gene lineages  
412 responsible for sex pheromone reception in moths, suggesting that sex pheromone reception in this  
413 butterfly may have evolved independently from their moth ancestors. In contrast, we found that  
414 sex pheromone biosynthesis could be regulated by the neuropeptide PBAN in both moths and  
415 butterflies, an evolutionarily shared derived trait for Lepidoptera.

416         Recently, the genomes of 250 species of skippers (Hesperiidae; Li et al. 2019) and 845  
417 North American butterfly species (Zhang *et al.* 2019) have been sequenced. A systematic  
418 comparative analysis of major gene families involved in moth sex pheromone communication in  
419 these ~1000 butterfly genomes would provide important information on the level of conservation  
420 of molecular pathways when butterflies diverged from moths about 98 million years ago.

421

## 422 **Materials and methods**

### 423 *Insects*

424 *Bicyclus anynana* (Butler, 1879) (Lepidoptera: Nymphalidae) originated from an outbred wild type  
425 population that was collected in Malawi, Africa, in 1988 using 80 gravid females. Since 1988,  
426 several hundred individuals have been used each generation to maintain high levels of  
427 heterozygosity (Brakefield *et al.* 2001) in a climate-controlled room at a temperature of 27°C, a  
428 relative humidity of 70%, and a photoperiod of L:D 12:12. Larvae were kept under these conditions  
429 on maize plants *Zea mays*, and adults fed mashed banana *Musa acuminata* for all experiments,  
430 except when stated otherwise.

431

432 ***Transcriptome***

433 **Tissue collection**

434 For the transcriptome dataset, several hundreds of virgin males and females were separated at the  
435 pupal stage in different cages, and tissues collected in March 2010. Pupal tissues were collected  
436 from male and female pupae 1 to 7 days after pupation (1 or 2 pupae per day after pupation and per  
437 sex); the wing imaginal discs were dissected as described in (Brakefield *et al.* 2009). Tissues for  
438 adult libraries (wings, heads and antennae) were collected from adult virgin males and females  
439 aged 1, 3, 5, 8, 10 and 14 days after emergence (Supplementary Figure 5): ~50 adults were used  
440 per age category and per library for wing libraries, ~10 adults were used per age category and per  
441 library for head tissues, and ~5 adult females and 5 males were used per age category for the  
442 antennae library. Brain tissue was obtained by cutting the head and cutting off the eyes, the  
443 proboscis and the antennae; antennal tissue was collected for a similar number of adult males and  
444 females (Figure 1). Dissected tissues were conserved immediately at -20°C in RNAlater (Sigma-  
445 Aldrich).

446

447 **RNA extraction**

448 RNAs of all dissections were extracted in April 2010, within a month after collection of tissues, in  
449 an RNA-free environment, on ice, and using the RNeasy Mini kit and the RNAase free DNAase  
450 kit (Qiagen). After RNA extraction, 1 µl of each RNA extract was used for testing RNA quality  
451 and quantity using a Bioanalyzer Systems (Agilent) at the LUMC hospital in Leiden (the  
452 Netherlands, courtesy of Dr Jeroen Pijpe), and using the RiboGreen RNA quantification kit,  
453 respectively. The remaining RNA extract was stored at -80°C for cDNA synthesis. For cDNA  
454 synthesis, we first pooled all RNA extracts dedicated to the same library in one tube per library, in  
455 such a way that: *i*) the same amount of RNA was present for each sex (male and female), *ii*) each



456 life stage was represented by similar RNA amounts (days 1 to 7 after pupation for pupal tissue  
457 libraries, days 1 to 14 after emergence for adult tissue libraries; Supplementary Table 9). Total  
458 RNA yield was 27 to 40 µg per library as requested for sequencing.

459

460 **mRNA isolation, cDNA synthesis and sequencing**

461 mRNA capture, cDNA synthesis and tagging for Titanium 454-sequencing was performed by  
462 Biogenomics, a KU Leuven Research & Development Division of the Laboratory of Animal  
463 Diversity and Systematics (Leuven, Belgium). Between 370 and 1,340 ng (0.3 and 1.6%) mRNA  
464 yield was obtained for each library, providing enough mRNA (minimum 200 ng per library) for  
465 cDNA construction and tagging. Yet, cDNA synthesis failed when started from mRNA, which is  
466 why a SMART cDNA synthesis was performed from total RNA. A custom normalization step  
467 (based on the EVROGEN Trimmer kit) was optimized in collaboration with the Roche R&D  
468 department and applied to the cDNA libraries, as no validated normalization protocol was available  
469 from Roche in 2010 for Titanium cDNA sequencing. Each normalized library was quality checked  
470 for fragment length and integrity before sequencing. Each library was subjected to GS FLX  
471 Titanium Emulsion PCR and Sequencing, and each library was sequenced 5 times. After  
472 sequencing, data were processed through certified Roche software (GS Transcriptome  
473 Assembler/Mapper) and custom scripts for advanced analysis. Basic data analysis included read  
474 quality trimming and assembly into contigs, including potential alternative splicing products. The  
475 sequences were trimmed by removing low quality sequences, ambiguous nucleotides, adapter  
476 sequences, and sequences with lengths less than 20 nucleotides. The 454-sequencing generated  
477 824,439 reads, with an average length of 293 base pairs and a total of 242,005,027 nucleotides  
478 (Supplementary Figure 6).

479

480 **Transcriptome assembly, quantification, and annotation**

481 Adaptors were removed with smartkitCleaner and adaptorCleaner. Raw sequences (reads) were  
482 cleaned with the software Pyrocleaner (Mariette et al. 2011[2] ), using the following criteria: (1)  
483 complexity/length ratio less than 40 (using a sliding window approach based on 100 bp sequence  
484 length, and a step of 5 bp); (2) duplicate read removal (see bias associated with pyrosequencing,  
485 due to the random generation of duplicate reads); (3) removal of too long/too short reads (maximum  
486 and minimum read length = mean read length  $\pm$  2 SD); (4) removal of reads with too many  
487 undetermined bases (more than 4 %). Contaminations were discarded by searching hits against *E.*  
488 *coli*, phage and yeasts.

489 The reads were assembled *de novo* in 43,149 contigs of 488 base pairs on average with a  
490 total of 21,087,824 nucleotides (Supplementary Figure 6). The average GC content was 36.44%.  
491 The assembly was performed with tpic 1  
492 (<https://academic.oup.com/bioinformatics/article/19/5/651/239299>) version 2.1 using standard  
493 parameters. The reads were realigned to the contigs and singletons with bwa aln version 0.7.2  
494 using standard parameters and transformed in bam format, sorted and indexed with samtools  
495 version 0.1.19 with default parameters. The bam files were then processed with samtools idxstats  
496 to extract expression measures in the form of numbers of reads aligned on each contig for every  
497 condition. These measures were then merged to produce the quantification file using unix cut and  
498 paste commands. Diamond was used to search for sequence homology between contig and the  
499 following generalist databases: UniProtKB/Swiss-Prot, UniProtKB/TrEMBLRelease of April, NR  
500 release of end of March.

501 The following species from the ensemble database were queried: *Bicyclus anynana*  
502 (nBA.0.1), *Calycopis cecrops* (v1.1), *Danaus plexippus* (v3), *Heliconius melpomene melpomene*

503 (Hmel2.5), *Junonia coenia* (JC v1.0), *Lerema accius* (v1.1), *Melitaea cinxia*, *Papilio machaon*  
504 (Pap\_ma\_1.0), *Phoebis sennae* (v1.1) and *Pieris napi* (v1.1).

505

#### 506 **Identification of specific gene families**

507 We also mined the transcriptome for specific families of genes supposedly involved in sex  
508 pheromone communication based on the available evidence in moths (Lepidoptera): desaturases,  
509 reductases, odorant receptors (OR), odorant binding proteins (OBP), and chemosensory proteins  
510 (CSP). For this:

511 *i)* we downloaded the DNA sequence of every *B. anynana* contig named as a desaturase, reductase,  
512 OR, OBP or CSP in our transcriptome;

513 *ii)* we checked the homology of the sequence of each candidate contig with gene members of the  
514 same family in other Lepidoptera by performing a blastx in Genbank;

515 *iii)* every *B. anynana* contig that showed significant homology in step *ii* was blasted in the  
516 transcriptome, allowing us to find more *B. anynana* ESTs of the same gene family, even if some  
517 had not been annotated as such. All these contigs and ESTs were then “candidate members of each  
518 respective gene family”. If no significant homology was found using blastx in step *ii*, the sequence  
519 was removed from the list of candidate members of the gene family;

520 *iv)* every *B. anynana* contig and EST candidate was then translated into an amino acid sequence  
521 using Expasy (<https://web.expasy.org/translate/>). When necessary, cdd analyses of domains were  
522 done. Using this procedure, 27 OR, 44 OBP and 70 CSP candidate members were found in the *B.*  
523 *anynana* transcriptome (Supplementary Tables 4, 7 and 8 for OR, OBP and CSP, respectively; for  
524 reductases and desaturases see Results). For example, 40 contigs were initially annotated as  
525 “odorant-binding protein” in our transcriptome, based on the characteristic hallmarks of the OBP  
526 protein families, including six highly conserved cysteines, i.e., “C” (in Lepidoptera C1-X25-30-

527 C2-X3-C3-X36-42-C4-X8-14-C5-X8-C6, with “X” being any amino acid; Xu *et al.* 2009). As  
528 sequence conservation between OBPs is low, i.e., between 25 and 50% identity for amino acid  
529 sequences, manually mining the transcriptome allowed us to find another seven OBP candidate  
530 members (Supplementary Tables 4, 7, and 8 for OR, OBP and CSP, respectively).

531 v) Candidate members were then manually aligned in Bioedit to group them into distinct expressed  
532 gene units, or unigenes: 17 Bany\_OR unigenes, 9 Bany\_OBP unigenes, including in some cases  
533 more "gene subunits" when contigs were similar enough to suggest that they represented different  
534 allelic variants of the same gene, such as Bany\_OBP3, Bany\_OBP4, Bany\_OBP6 (Supplementary  
535 Table 5) and 8 Bany\_CSP unigenes with some more gene subunits as well (Supplementary Table  
536 6).

537 vi) The expression level of each candidate unigene across libraries was then obtained by pooling  
538 the number of copies in the *B. anynana* transcriptome of each EST and contig forming the unigene.  
539

#### 540 ***Phylogenies***

541 For the OR phylogeny, amino acid sequences found in the *B. anynana* transcriptome were aligned  
542 with OR sequences previously identified in the genomes of *B. mori* and *H. melpomene*  
543 (Dasmahapatra *et al.* 2012) and in antennal transcriptomes of *C. pomonella* (Walker *et al.* 2016)  
544 and *S. littoralis* (Walker *et al.* 2019). Alignment was performed with MAFFT v7  
545 (<https://mafft.cbrc.jp/alignment/server/>), and the maximum-likelihood phylogeny was built using  
546 PhyML 3.0 (Guindon *et al.* 2010). Branch support was assessed using a likelihood-ratio test  
547 (Anisimova & Gascuel 2006). Published datasets of Lepidoptera protein sequences from previous  
548 phylogenetic studies were used for testing the phylogenetic position of *B. anynana* ORs (Poivet *et*  
549 *al.* 2013; Supplementary File 3), OBPs (Vogt *et al.* 2015; Supplementary File 4), desaturases and  
550 reductases (Li nard *et al.* 2014; Supplementary Files 5 and 6).

551

## 552 ***Quantitative real time PCR***

553 Biological replicates were the mRNA extracted from either a single individual or formed by  
554 pooling 3 to 5 individuals of various ages in experiments for the “reception” and the “production”  
555 communication steps, respectively. Each treatment is represented by 3 to 7 biological replicates.  
556 The protocol used for quantitative real time PCR is described in Arun *et al.* (2015). Briefly, total  
557 RNA was extracted using the RNeasy Mini kit following manufacturer’s instructions. Residual  
558 DNA was removed after treating extracted RNA using a DNase enzyme. A nanodrop ND-1000  
559 spectrophotometer was then used to assess the integrity of the RNA before conversion into cDNA.  
560 qRT-PCR was carried out using the SYBR green dye in a 96-well thermocycler with parameters  
561 described in Arun *et al.* (2015). Primer sequences for all genes are available in Supplementary  
562 Table 10. Relative transcript abundance was calculated using the  $2(-\Delta Ct)$  method. Statistical  
563 significance of differences in expression levels expressed in Rq values after log-transformation was  
564 tested using nested ANOVA with technical replicates nested with biological replicates; the model  
565 was  $\log(Rq) \sim \text{treatment} / \text{biological replicate} / \text{technical replicate} + \text{Error}(\text{tissue} / \text{biological}$   
566  $\text{replicate} / \text{technical replicate})$ . R version 3.6.1 (R Core Team 2020) was used for statistical  
567 analyses.

568

## 569 ***Behavioral experiments***

### 570 **Mating experiments for quantifying odorant receptor expression levels**

571 Naïve virgin females were reared in isolated conditions (devoid of the male secondary sexual traits  
572 putatively involved in sexual communication, i.e., olfaction, vision and audition) directly after egg  
573 collection. The virgin sensitized females were reared in a MSP-containing environment near cages

574 containing males. The sensitized mated females were reared in a MSP-containing environment and  
575 mated at an age of 3 days. All females were sacrificed at day 5 and the antennal tissues were used  
576 for RNA extraction and RT-qPCR analysis (as described above).

577

### 578 **Daily variation in courtship activity**

579 We tested whether courtship activity in *B. anynana* males varies throughout the day. A large  
580 number of individuals were reared and age after emergence was recorded. The day before the  
581 experiment, five males and four females between 2 and 12 days old were randomly chosen and  
582 grouped in a cage (40cm x 30cm, cylindrical). The cages were placed in a room with a temperature  
583 of ~27°C with natural light, and a 14:10 day-night regime. The butterflies were fed with banana  
584 slices and had access to water during the course of the experiment. We used five cages per trial and  
585 produced three trials with different individuals. A generalized mixed model with binomial error  
586 distribution was used to characterize the courting activity of males during the day. The  
587 presence/absence of courtship behavior for each male during 15 minutes of observations per hour  
588 was used as the dependent variable. As we expected courtship activity to peak at some time point  
589 during the day, we used “time of the day” (in the number of hours after natural sunrise) and its  
590 second order polynomial as a fixed explanatory variable. The age of males (in days) was also  
591 included as a fixed cofactor to control for the effect of age. The identity of each individual, cage  
592 and trial were used as random effects with individual nested within cage and cage nested within  
593 trial. We tested the model parameters with type III likelihood ratio tests, in which a model without  
594 the explanatory variable of interest is compared to the full model, both models being estimated by  
595 Maximum Likelihood.

596

597 **Daily variation in male sex pheromone production**

598 A number of butterfly couples were set up using adult virgin stock males and females. Three  
599 families were started from three couples that produced over 200 offspring. The three families were  
600 each partly reared into two different climate rooms that differed in the onset of artificial daylight  
601 (one at 9:00 am, the other at 12:00 pm). This allowed us to control for the potential effect climate  
602 cell-specific conditions on variation in MSP production. Forty to 80 males that emerged the same  
603 day were selected per family. MSP production of 8-day old males was sampled, an age at which  
604 each MSP component is produced in measurable quantities (Nieberding *et al.* 2008). Four to 7  
605 males of each family were killed and conserved at -80° for subsequent pheromone analysis at seven  
606 sampling points during the day: 1, 4, 8, 11, 13, 18 and 23 hours after the onset of daylight. MSP  
607 production was measured as described below in the section “male sex pheromone quantification”.

608 We used mixed models with normal error distribution to characterize the variation of MSP  
609 production during the day. The titre of each MSP component and the ratios between pairs of MSP  
610 components were used as dependent variables. MSP titres were square root transformed and MSP  
611 ratios were log-transformed to improve the normality and homoscedasticity of the residuals. As we  
612 suspected MSP production to peak at some time point during the day, we used a second order  
613 polynomial equation with time and time<sup>2</sup> as a fixed explanatory variables and family as a random  
614 effect. We tested model parameters with type III likelihood ratio tests, in which a model without  
615 the explanatory variable of interest is compared to the full model, both models being estimated by  
616 Maximum Likelihood. We estimated the percentage of variation explained by the models and each  
617 of their components with pseudo R<sup>2</sup> based on ratios of sums of squared residuals. We followed  
618 Legendre & Legendre (1998) for the variance decomposition procedure.

619

620 ***Quantification of male sex pheromone production***

621 MSP concentrations were determined as previously described (Nieberding *et al.* 2008, 2018). In  
622 short, one forewing and hindwing of each male was soaked in 600ul of hexane during 5 minutes.  
623 One ng/ul of the internal standard (palmitic acid) was then added. Extracts were analyzed on a  
624 Hewlett-Packard 6890 series II gas chromatograph (GC) equipped with a flame-ionization detector  
625 and interfaced with a HP-6890 series integrator, using nitrogen as carrier gas. The injector  
626 temperature was set at 240 °C and the detector temperature at 250 °C. A HP-1 column was used  
627 and temperature increased from the initial temperature of 50 °C by 15 °C/min up to a final  
628 temperature of 295 °C, which was maintained for 6 min.

629

630 **References**

- 631 Andersson, J., Borg-Karlson, A.-K., Vongvanich, N. & Wiklund, C. (2007). Male sex pheromone release and  
632 female mate choice in a butterfly. *J. Exp. Biol.*, 210, 964–970.
- 633 Andersson, M. (1994). *Sexual selection*. Princeton University Press.
- 634 Ando, T., Inomata, S. & Yamamoto, M. (2004). Lepidopteran Sex Pheromones. In: *The Chemistry of*  
635 *Pheromones and Other Semiochemicals I. Topics in Current Chemistry* (ed. Schulz, S.). Springer,  
636 Berlin, Heidelberg.
- 637 Anisimova, M. & Gascuel, O. (2006). Approximate likelihood-ratio test for branches: A fast, accurate, and  
638 powerful alternative. *Syst. Biol.*, 55, 539–552.
- 639 Arun, A., Baumlé, V., Amelot, G. & Nieberding, C.M. (2015). Selection and validation of reference genes  
640 for qRT-PCR expression analysis of candidate genes involved in olfactory communication in the  
641 butterfly *Bicyclus anynana*. *PLoS One*, 10, 1–17.
- 642 Bacquet, P.M.B., Brattström, O., Wang, H.L., Allen, C.E., Löfstedt, C., Brakefield, P.M., *et al.* (2015).  
643 Selection on male sex pheromone composition contributes to butterfly reproductive isolation. *Proc.*



- 644 *R. Soc. B Biol. Sci.*, 282, 20142734.
- 645 Bastin-Héline, L., de Fouchier, A., Cao, S., Koutroumpa, F., Caballero-Vidal, G., Robakiewicz, S., *et al.*  
646 (2019). A novel lineage of candidate pheromone receptors for sex communication in moths. *Elife*, 8,  
647 1–17.
- 648 Bengtsson, J.M., Gonzalez, F., Cattaneo, A.M., Montagné, N., Walker, W.B., Bengtsson, M., *et al.* (2014).  
649 A predicted sex pheromone receptor of codling moth *Cydia pomonella* detects the plant volatile  
650 pear ester. *Front. Ecol. Evol.*, 2, 1–11.
- 651 van Bergen, E., Brakefield, P.M., Heuskin, S., Zwaan, B.J. & Nieberding, C.M. (2013). The scent of  
652 inbreeding: A male sex pheromone betrays inbred males. *Proc. R. Soc. B Biol. Sci.*
- 653 Berner, D. & Salzburger, W. (2015). The genomics of organismal diversification illuminated by adaptive  
654 radiations. *Trends Genet.*, 31, 491–499.
- 655 Birch, M.C., Poppy, G.M. & Baker, T.C. (1990). Scents and eversible scent structures of male moths. *Annu.*  
656 *Rev. Entomol.*, 35, 25–58.
- 657 Bloch, G., Hazan, E. & Rafaeli, A. (2013). Circadian rhythms and endocrine functions in adult insects. *J.*  
658 *Insect Physiol.*, 59, 56–69.
- 659 Blomquist, G., Jurenka, R., Schal, C. & Tittiger, C. (2012). 12 - Pheromone Production: Biochemistry and  
660 Molecular Biology. In: *Insect Endocrinology* (ed. Gilbert, L.). Academic Press, pp. 523–567.
- 661 Bober, R. & Rafaeli, A. (2010). Gene-silencing reveals the functional significance of pheromone  
662 biosynthesis activating neuropeptide receptor (PBAN-R) in a male moth. *Proc. Natl. Acad. Sci. U. S.*  
663 *A.*, 107, 16858–16862.
- 664 Brakefield, P., Beldade, P. & Zwaan, B. (2009). Dissection of larval and pupal wings from the African  
665 butterfly *Bicyclus anynana*. *Cold Spring Harb. Protoc.*
- 666 Brakefield, P.M., Filali, E. El, Van Der Laan, R., Brueker, C.J., Saccheri, I.J. & Zwaan, B. (2001). Effective  
667 population size, reproductive success and sperm precedence in the butterfly, *Bicyclus anynana*, in

- 668           captivity. *J. Evol. Biol.*, 14, 148–156.
- 669   Briscoe, A.D., Macias-Muñoz, A., Kozak, K.M., Walters, J.R., Yuan, F., Jamie, G.A., *et al.* (2013). Female  
670           behaviour drives expression and evolution of gustatory receptors in butterflies. *PLoS Genet.*, 9,  
671           e1003620.
- 672   Cheng, Y., Luo, L., Jiang, X., Zhang, L. & Niu, C. (2010). Expression of pheromone biosynthesis activating  
673           neuropeptide and its receptor (PBANR) mRNA in adult female *Spodoptera exigua* (Lepidoptera:  
674           Noctuidae). *Arch. Insect Biochem. Physiol.*, 75, 13–27.
- 675   Costanzo, K. & Monteiro, A. (2007). The use of chemical and visual cues in female choice in the butterfly  
676           *Bicyclus anynana*. *Proc. R. Soc. B Biol. Sci.*, 274, 845–851.
- 677   Cracraft, J. (1970). Mandible of archaeopteryx provides an example of mosaic evolution. *Nature*, 226,  
678           1268.
- 679   Daeschler, E.B., Shubin, N.H. & Jenkins, F.A. (2006). A Devonian tetrapod-like fish and the evolution of  
680           the tetrapod body plan. *Nature*, 440, 757–763.
- 681   Dani, F.R., Michelucci, E., Francese, S., Mastrobuoni, G., Cappelozza, S., La Marca, G., *et al.* (2011).  
682           Odorant-binding proteins and chemosensory proteins in pheromone detection and release in the  
683           silkworm *Bombyx mori*. *Chem. Senses*, 36, 335–344.
- 684   Darragh, K., Vanjari, S., Mann, F., Gonzalez-Rojas, M.F., Morrison, C.R., Salazar, C., *et al.* (2017). Male sex  
685           pheromone components in *Heliconius* butterflies released by the androconia affect female choice.  
686           *PeerJ*, 5, e3953.
- 687   Dasmahapatra, K.K., Walters, J.R., Briscoe, A.D., Davey, J.W., Whibley, A., Nadeau, N.J., *et al.* (2012).  
688           Butterfly genome reveals promiscuous exchange of mimicry adaptations among species. *Nature*,  
689           487, 94–98.
- 690   Fernández, R. & Gabaldón, T. (2020). Gene gain and loss across the metazoan tree of life. *Nat. Ecol. Evol.*,  
691           4, 524–533.

- 692 de Fouchier, A., Montagné, N., Mirabeau, O. & Jacquin-Joly, E. (2014). Current views on the function and  
693 evolution of olfactory receptors in Lepidoptera. *Short Views Insect Biochem. Mol. Biol. S*, 2, 385–  
694 408.
- 695 van Gestel, J., Ackermann, M. & Wagner, A. (2019). Microbial life cycles link global modularity in  
696 regulation to mosaic evolution. *Nat. Ecol. Evol.*, 3, 1184–1196.
- 697 Gómez-Robles, A., Hopkins, W.D. & Sherwood, C.C. (2014). Modular structure facilitates mosaic  
698 evolution of the brain in chimpanzees and humans. *Nat. Commun.*, 5, 4469.
- 699 Gong, D.P., Zhang, H. jie, Zhao, P., Lin, Y., Xia, Q.Y. & Xiang, Z.H. (2007). Identification and expression  
700 pattern of the chemosensory protein gene family in the silkworm, *Bombyx mori*. *Insect Biochem.*  
701 *Mol. Biol.*, 37, 266–277.
- 702 Gong, D.P., Zhang, H.J., Zhao, P., Xia, Q.Y. & Xiang, Z.H. (2009). The odorant binding protein gene family  
703 from the genome of silkworm, *Bombyx mori*. *BMC Genomics*, 10, 332.
- 704 Grosse-Wilde, E., Kuebler, L.S., Bucks, S., Vogel, H., Wicher, D. & Hansson, B.S. (2011). Antennal  
705 transcriptome of *Manduca sexta*. *Proc. Natl. Acad. Sci. U. S. A.*, 108, 7449–7454.
- 706 Grula, J.W., McChesney, J.D. & Taylor, O.R. (1980). Aphrodisiac pheromones of the sulfur butterflies  
707 *Colias eurytheme* and *C. Philodice* (Lepidoptera, Pieridae). *J. Chem. Ecol.*, 6, 241–256.
- 708 Gu, S.H., Wu, K.M., Guo, Y.Y., Pickett, J.A., Field, L.M., Zhou, J.J., *et al.* (2013). Identification of genes  
709 expressed in the sex pheromone gland of the black cutworm *Agrotis ipsilon* with putative roles in  
710 sex pheromone biosynthesis and transport. *BMC Genomics*, 14, 636.
- 711 Guijarro-Clarke, C., Holland, P.W.H. & Paps, J. (2020). Widespread patterns of gene loss in the evolution  
712 of the animal kingdom. *Nat. Ecol. Evol.*, 4, 519–523.
- 713 Guindon, S., Dufayard, J.F., Lefort, V., Anisimova, M., Hordijk, W. & Gascuel, O. (2010). New algorithms  
714 and methods to estimate maximum-likelihood phylogenies: Assessing the performance of PhyML  
715 3.0. *Syst. Biol.*, 59, 307–321.

- 716 Guo, H., Del Corso, A., Huang, L.Q., Mura, U., Pelosi, P. & Wang, C.Z. (2014). Aldehyde reductase activity  
717 in the antennae of *Helicoverpa armigera*. *Insect Mol. Biol.*, 23, 330–340.
- 718 Hansson, B.S. & Stensmyr, M.C. (2011). Evolution of insect olfaction. *Neuron*, 72, 698–711.
- 719 Helmkampf, M., Cash, E. & Gadau, J. (2015). Evolution of the insect desaturase gene family with an  
720 emphasis on social hymenoptera. *Mol. Biol. Evol.*, 32, 456–471.
- 721 Heuskin, S., Vanderplanck, M., Bacquet, P., Holveck, M.J., Kaltenpoth, M., Engl, T., *et al.* (2014). The  
722 composition of cuticular compounds indicates body parts, sex and age in the model butterfly  
723 *Bicyclus anynana* (Lepidoptera). *Front. Ecol. Evol.*, 2, 1–16.
- 724 Johansson, B.G. & Jones, T.M. (2007). The role of chemical communication in mate choice. *Biol. Rev.*, 82,  
725 265–289.
- 726 Jurenka, R. (2004). Insect Pheromone Biosynthesis. In: *The Chemistry of Pheromones and Other*  
727 *Semiochemicals I. Topics in Current Chemistry, vol 239* (ed. Schulz, S.). Springer, pp. 97–132.
- 728 Keys, D.N., Lewis, D.L., Selegue, J.E., Pearson, B.J., Goodrich, L. V., Johnson, R.L., *et al.* (1999).  
729 Recruitment of a hedgehog regulatory circuit in butterfly eyespot evolution. *Science* (80-. ), 283,  
730 532–534.
- 731 Latorre-Estivalis, J.M., Omondi, B.A., DeSouza, O., Oliveira, I.H.R., Ignell, R. & Lorenzo, M.G. (2015).  
732 Molecular basis of peripheral olfactory plasticity in *Rhodnius prolixus*, a Chagas disease vector.  
733 *Front. Ecol. Evol.*, 3, 74.
- 734 Leal, W.S. (2013). Odorant reception in insects: Roles of receptors, binding proteins, and degrading  
735 enzymes. *Annu. Rev. Entomol.*, 58, 373–391.
- 736 Legeai, F., Malpel, S., Montagné, N., Monsempe, C., Cousserans, F., Merlin, C., *et al.* (2011). An  
737 expressed sequence tag collection from the male antennae of the noctuid moth *Spodoptera*  
738 *littoralis*: A resource for olfactory and pheromone detection research. *BMC Genomics*, 12, 86.
- 739 Legendre, P. & Legendre, L. (1998). *Numerical Ecology*. 2nd edn. Elsevier, Amsterdam.

- 740 Levi-Zada, A., David, M., Fefer, D., Seplyarsky, V., Sadowsky, A., Dobrinin, S., *et al.* (2014). Circadian  
741 release of male-specific components of the greater date moth, *Aphomia (Arenipses) Sabella*, using  
742 sequential SPME/GC/MS analysis. *J. Chem. Ecol.*, 40, 236–243.
- 743 Li, W., Cong, Q., Shen, J., Zhang, J., Hallwachs, W., Janzen, D.H., *et al.* (2019). Genomes of skipper  
744 butterflies reveal extensive convergence of wing patterns. *Proc. Natl. Acad. Sci. U. S. A.*, 116, 6232–  
745 6237.
- 746 Liénard, M.A., Wang, H.L., Lassance, J.M. & Löfstedt, C. (2014). Sex pheromone biosynthetic pathways  
747 are conserved between moths and the butterfly *Bicyclus anynana*. *Nat. Commun.*, 5, 3957.
- 748 Marques, D., Meier, J. & Seehausen, O. (2019). A combinatorial view on speciation and adaptive  
749 radiation. *Trends Ecol. Evol.*, 34, 531–544.
- 750 Moore, P.J., Reagan-Wallin, N.L., Haynes, K.F. & Moore, A.J. (1997). Odour conveys status on  
751 cockroaches. *Nature*, 389, 25.
- 752 Moto, K., Yoshiga, T., Yamamoto, M., Takahashi, S., Okano, K., Ando, T., *et al.* (2003). Pheromone gland-  
753 specific fatty-acyl reductase of the silkworm, *Bombyx mori*. *Proc. Natl. Acad. Sci. U. S. A.*, 100, 9156–  
754 9161.
- 755 Myers, J. (1972). Pheromones and courtship behavior in butterflies. *Am. Zool.*, 12, 545–551.
- 756 Nieberding, C.M., Fischer, K., Saastamoinen, M., Allen, C.E., Wallin, E.A., Hedenström, E., *et al.* (2012).  
757 Cracking the olfactory code of a butterfly: The scent of ageing. *Ecol. Lett.*, 15, 415–424.
- 758 Nieberding, C.M., San Martin, G., Saenko, S., Allen, C.E., Brakefield, P.M. & Visser, B. (2018). Sexual  
759 selection contributes to partial restoration of phenotypic robustness in a butterfly. *Sci. Rep.*, 8, 1–  
760 13.
- 761 Nieberding, C.M., de Vos, H., Schneider, M. V., Lassance, J.M., Estramil, N., Andersson, J., *et al.* (2008).  
762 The male sex pheromone of the butterfly *Bicyclus anynana*: Towards an evolutionary analysis. *PLoS*  
763 *One*, 3, 1–12.

- 764 Nishida, R., Schulz, S., Kim, C.S., Fukami, H., Kuwahara, Y., Honda, K., *et al.* (1996). Male sex pheromone  
765 of a giant danaine butterfly, *Idea leuconoe*. *J. Chem. Ecol.*, 22, 949–972.
- 766 Nowell, R.W., Elsworth, B., Oostra, V., Zwaan, B.J., Wheat, C.W., Saastamoinen, M., *et al.* (2017). A high-  
767 coverage draft genome of the mycalesine butterfly *Bicyclus anynana*. *Gigascience*, 6, 1–7.
- 768 Pelosi, P., Iovinella, I., Felicioli, A. & Dani, F.R. (2014). Soluble proteins of chemical communication: An  
769 overview across arthropods. *Front. Physiol.*, 5, 1–13.
- 770 Pelosi, P., Zhou, J.J., Ban, L.P. & Calvello, M. (2006). Soluble proteins in insect chemical communication.  
771 *Cell. Mol. Life Sci.*, 63, 1658–1676.
- 772 Pelosi, P., Zhu, J. & Knoll, W. (2018). Odorant-binding proteins as sensing elements for odour monitoring.  
773 *Sensors*, 18, 3248.
- 774 Pliski, T. & Eisner, T. (1969). Sex pheromone of the queen butterfly: Biology. *Science (80-. )*, 164, 1170–  
775 1172.
- 776 R Core Team. (2020). R: A language and environment for statistical computing.
- 777 Rafaeli, A. (2016). Revelations on the regulatory mechanisms in moth sex-pheromone signals. In:  
778 *Management of Insect Pests to Agriculture: Lessons Learned from Deciphering their Genome,*  
779 *Transcriptome and Proteome* (eds. Czosnek, H. & Ghanim, M.). Springer, pp. 115–129.
- 780 Rosén, W.Q. (2002). Endogenous control of circadian rhythms of pheromone production in the turnip  
781 moth, *Agrotis segetum*. *Arch. Insect Biochem. Physiol.*, 50, 21–30.
- 782 Sakurai, T., Nakagawa, T., Mitsuno, H., Mori, H., Endo, Y., Tanoue, S., *et al.* (2004). Identification and  
783 functional characterization of a sex pheromone receptor in the silkworm *Bombyx mori*. *Proc. Natl.*  
784 *Acad. Sci. U. S. A.*, 101, 16653–16658.
- 785 Sánchez-Gracia, A., Vieira, F.G. & Rozas, J. (2009). Molecular evolution of the major chemosensory gene  
786 families in insects. *Heredity (Edinb.)*, 103, 208–216.
- 787 Sappington, T.W. & Taylor, O.R. (1990a). Developmental and environmental sources of pheromone

- 788 variation in *Colias eurytheme* butterflies. *J. Chem. Ecol.*, 16, 2771–2786.
- 789 Sappington, T.W. & Taylor, O.R. (1990b). Disruptive sexual selection in *Colias eurytheme* butterflies. *Proc.*  
790 *Natl. Acad. Sci. U. S. A.*, 87, 6132–6135.
- 791 Sarto Monteys, V.I., Quero, C., Santa-Cruz, M.C., Rosell, G. & Guerrero, A. (2016). Sexual communication  
792 in day-flying Lepidoptera with special reference to castniids or “butterfly-moths.” *Bull. Entomol.*  
793 *Res.*, 106, 421–431.
- 794 Shen, S., Cao, S., Zhang, Z., Kong, X., Liu, F., Wang, G., *et al.* (2020). Evolution of sex pheromone  
795 receptors in *Dendrolimus punctatus* Walker (Lepidoptera: Lasiocampidae) is divergent from other  
796 moth species. *Insect Biochem. Mol. Biol.*, 122, 103375.
- 797 Simão, F.A., Waterhouse, R.M., Ioannidis, P., Kriventseva, E. V. & Zdobnov, E.M. (2015). BUSCO:  
798 Assessing genome assembly and annotation completeness with single-copy orthologs.  
799 *Bioinformatics*, 31, 3210–3212.
- 800 Smadja, C. & Butlin, R.K. (2009). On the scent of speciation: The chemosensory system and its role in  
801 pre-mating isolation. *Heredity (Edinb.)*, 102, 77–97.
- 802 Soques, S., Vásquez, G.M., Grozinger, C.M. & Gould, F. (2010). Age and mating status do not affect  
803 transcript levels of odorant receptor genes in male antennae of *Heliothis virescens* and *Heliothis*  
804 *subflexa*. *J. Chem. Ecol.*, 36, 1226–1233.
- 805 Stryjewski, K.F. & Sorenson, M.D. (2017). Mosaic genome evolution in a recent and rapid avian radiation.  
806 *Nat. Ecol. Evol.*, 1, 1912–1922.
- 807 Svensson, M. (1996). Sexual selection in moths: The role of chemical communication. *Biol. Rev.*, 71, 113–  
808 135.
- 809 Taylor, O. (1973). Reproductive isolation in *Colias eurytheme* and *C. philodice* (Lepidoptera: Pieridae):  
810 Use of olfaction in mate selection. *Ann. Entomol. Soc. Am.*, 66, 621–626.
- 811 Tillman, J.A., Seybold, S.J., Jurenka, R.A. & Blomquist, G.J. (1999). Insect pheromones - An overview of

- 812 biosynthesis and endocrine regulation. *Insect Biochem. Mol. Biol.*, 29, 481–514.
- 813 Tupec, M., Buček, A., Janoušek, V., Vogel, H., Prchalová, D., Kindl, J., *et al.* (2019). Expansion of the fatty  
814 acyl reductase gene family shaped pheromone communication in Hymenoptera. *Elife*, 8, 1–33.
- 815 Tupec, M., Buček, A., Valterová, I. & Pichová, I. (2017). Biotechnological potential of insect fatty acid-  
816 modifying enzymes. *Zeitschrift fur Naturforsch. - Sect. C J. Biosci.*, 72, 387–403.
- 817 Vane-Wright, R.I. & Boppre, M. (1993). Visual and chemical signalling in butterflies: functional and  
818 phylogenetic perspectives. *Philos. Trans. - R. Soc. London, B*, 340, 197–205.
- 819 Venthur, H. & Zhou, J.J. (2018). Odorant receptors and odorant-binding proteins as insect pest control  
820 targets: A comparative analysis. *Front. Physiol.*, 9, 1–16.
- 821 Vieira, F.G. & Rozas, J. (2011). Comparative genomics of the odorant-binding and chemosensory protein  
822 gene families across the arthropoda: Origin and evolutionary history of the chemosensory system.  
823 *Genome Biol. Evol.*, 3, 476–490.
- 824 Vieira, F.G., Sánchez-Gracia, A. & Rozas, J. (2007). Comparative genomic analysis of the odorant-binding  
825 protein family in 12 *Drosophila* genomes: Purifying selection and birth-and-death evolution.  
826 *Genome Biol.*
- 827 Vogt, R.G., Große-Wilde, E. & Zhou, J.J. (2015). The Lepidoptera odorant binding protein gene family:  
828 Gene gain and loss within the GOBP/PBP complex of moths and butterflies. *Insect Biochem. Mol.*  
829 *Biol.*, 62, 142–153.
- 830 Wahlberg, N., Wheat, C.W. & Peña, C. (2013). Timing and patterns in the taxonomic diversification of  
831 Lepidoptera (butterflies and moths). *PLoS One*, 8, 1–8.
- 832 Walker, W.B., Gonzalez, F., Garczynski, S.F. & Witzgall, P. (2016). The chemosensory receptors of codling  
833 moth *Cydia pomonella*-expression in larvae and adults. *Sci. Rep.*, 6, 1–15.
- 834 Walker, W.B., Roy, A., Anderson, P., Schlyter, F., Hansson, B.S. & Larsson, M.C. (2019). Transcriptome  
835 Analysis of Gene Families Involved in Chemosensory Function in *Spodoptera littoralis* (Lepidoptera:



- 836 Noctuidae). *BMC Genomics*, 20, 1–20.
- 837 Wyatt, T.D. (2014). *Pheromones and animal behaviour: chemical signals and signatures*. 2nd edn.  
838 Cambridge Univ Press, Cambridge (UK).
- 839 Xu, X., Currie, P., Pittman, M., Xing, L., Meng, Q., Lü, J., *et al.* (2017). Mosaic evolution in an  
840 asymmetrically feathered troodontid dinosaur with transitional features. *Nat. Commun.*, 8.
- 841 Xu, Y.L., He, P., Zhang, L., Fang, S.Q., Dong, S.L., Zhang, Y.J., *et al.* (2009). Large-scale identification of  
842 odorant-binding proteins and chemosensory proteins from expressed sequence tags in insects.  
843 *BMC Genomics*, 10, 1–13.
- 844 Yamamoto, K., Higashiura, A., Suzuki, M., Shiotsuki, T., Sugahara, R., Fujii, T., *et al.* (2016). Structural  
845 characterization of an aldo-keto reductase (AKR2E5) from the silkworm *Bombyx mori*. *Biochem.*  
846 *Biophys. Res. Commun.*, 474, 104–110.
- 847 Yew, J.Y. & Chung, H. (2015). Insect pheromones: An overview of function, form, and discovery. *Prog.*  
848 *Lipid Res.*, 59, 88–105.
- 849 Zhan, S., Merlin, C., Boore, J.L. & Reppert, S.M. (2011). The monarch butterfly genome yields insights into  
850 long-distance migration. *Cell*, 147, 1171–1185.
- 851 Zhang, D.D. & Löfstedt, C. (2015). Moth pheromone receptors: Gene sequences, function, and evolution.  
852 *Front. Ecol. Evol.*, 3, 1–10.
- 853 Zhang, J., Cong, Q., Shen, J., Opler, P. & Grishin, N. (2019). Genomics of a complete butterfly continent.  
854 *bioRxiv*, 845, 829887.
- 855 Zhang, J., Walker, W.B. & Wang, G. (2015). Pheromone reception in moths: From molecules to behaviors.  
856 In: *Progress in Molecular Biology and Translational Science* (ed. Glatz, R.). Academic Press, pp. 109–  
857 128.
- 858 Zhang, Y.N., Xia, Y.H., Zhu, J.Y., Li, S.Y. & Dong, S.L. (2014). Putative pathway of sex pheromone  
859 biosynthesis and degradation by expression patterns of genes identified from female pheromone

860 gland and adult antenna of *Sesamia inferens* (Walker). *J. Chem. Ecol.*, 40, 439–451.

861
